# Supplementary material for: Towards unified reporting of genome sequencing results in clinical microbiology
Source: PeerJ journal article supplement (doi:10.7717/peerj.17673), 2024-08-08
Supplement: Supplemental_Table_S1_Experience_in_varying_fields.docx [file Supplemental_Table_S1_Experience_in_varying_fields.docx]

|  | **Number (% survey total)** | | | | | | |
| --- | --- | --- | --- | --- | --- | --- | --- |
| **Experience** | **Molecular Biology, Biochemistry** | **Epidemiology** | **Biostatistics** | **Bioinformatics** | **Genomics** | **Infectious Diseases** | **Clinical Microbiology** |
| **None** | 3 (4.7%) | 7 (10.9%) | 17 (26.6%) | 14 (21.9%) | 6 (9.4%) | 3 (4.7%) | 4 (6.3%) |
| **Undergrad.** | 13 (20.3%) | 5 (7.8%) | 14 (21.9%) | 5 (7.8%) | 9 (14.1%) | 3 (4.7%) | 3 (4.7%) |
| **Graduate (MSc and/or PhD)** | 14 (21.9%) | 7 (10.9%) | 11 (17.2%) | 7 (10.9%) | 10 (15.6%) | 9 (14.1%) | 12 (18.8%) |
| **Professional Experience** | 17 (26.6%) | 28 (43.8%) | 15 (23.4%) | 18 (28.1%) | 19 (29.7%) | 30 (46.9%) | 22 (34.4%) |
| **Continuing Education** | 17 (26.6%) | 17 (26.6%) | 7 (10.9%) | 20 (31.3%) | 20 (31.3%) | 19 (29.7%) | 23 (35.9%) |
