# Supplementary material for: Towards unified reporting of genome sequencing results in clinical microbiology
Source: PeerJ journal article supplement (doi:10.7717/peerj.17673), 2024-08-08
Supplement: Supplemental_Table_S2_Location_of_Participants.docx [file Supplemental_Table_S2_Location_of_Participants.docx]

| **Location** | **N (% of sample)** |
| --- | --- |
| Switzerland | 22 (34.9%) |
| Netherlands | 10 (15.9%) |
| Germany | 6 (9.5%) |
| Denmark | 3 (4.8% ) |
| Czech Republic | 2 (3.2%) |
| Portugal | 2 (3.2%) |
| Belgium | 2 (3.2%) |
| USA | 2 (3.2%) |
| Argentina | 1 (1.6%) |
| Austria | 1 (1.6%) |
| Canada | 1 (1.6%) |
| Caribbean | 1 (1.6%) |
| Finland | 1 (1.6%) |
| France | 1 (1.6%) |
| Ireland | 1 (1.6%) |
| Italy | 1 (1.6%) |
| Norway | 1 (1.6%) |
| Qatar | 1 (1.6%) |
| Spain | 1 (1.6%) |
| Sweden | 1 (1.6%) |
| Turkey | 1 (1.6%) |
| UK | 1 (1.6%) |
