# Supplementary material for: Towards unified reporting of genome sequencing results in clinical microbiology
Source: PeerJ journal article supplement (doi:10.7717/peerj.17673), 2024-08-08
Supplement: Supplemental_Table_S3_Clinical_Management.docx [file Supplemental_Table_S3_Clinical_Management.docx]

| **Clinical Management** | | | | | | | | | | |
| --- | --- | --- | --- | --- | --- | --- | --- | --- | --- | --- |
|  |  | Sample Details | Assay Details | Short Summary of Final Results | Lineage/ Organism | Drug Susceptibility/ Resistance Prediction | WGS-based Cluster Detection | Depth and Coverage Details | Disclaimer regarding Limitations of the Analysis | Authorization of the Analysis/Signature |
| N |  | 14 | 14 | 14 | 14 | 14 | 14 | 14 | 14 | 14 |
| Median | | 1.00 | 6.00 | 2.00 | 3.00 | 5.00 | 4.00 | 6.50 | 8.00 | 9.00 |
| Mode | | 1 | 6a | 2 | 3a | 5 | 4 | 7 | 8 | 9 |
| Minimum | | 1 | 1 | 1 | 1 | 3 | 2 | 2 | 4 | 7 |
| Maximum | | 6 | 8 | 8 | 7 | 6 | 8 | 9 | 9 | 9 |
| Percentile | 25 | 1.00 | 3.00 | 1.75 | 2.00 | 3.00 | 4.00 | 5.00 | 6.75 | 8.00 |
| 50 | 1.00 | 6.00 | 2.00 | 3.00 | 5.00 | 4.00 | 6.50 | 8.00 | 9.00 |
| 75 | 2.00 | 7.25 | 6.25 | 4.00 | 5.00 | 6.00 | 7.00 | 9.00 | 9.00 |
| a. More than one mode value. The lowest value is displayed. | | | | | | | | | | |
